# Supplementary material for: Single-Cell Transcriptome Atlas of Newcastle Disease Virus in Chickens Both In Vitro and In Vivo
Source: PubMed Central journal article supplement (PMC10269786; doi:10.1128/spectrum.05121-22), 2023-05-16
Supplement: spectrum.05121-22-s0002.pdf [file spectrum.05121-22-s0002.pdf]

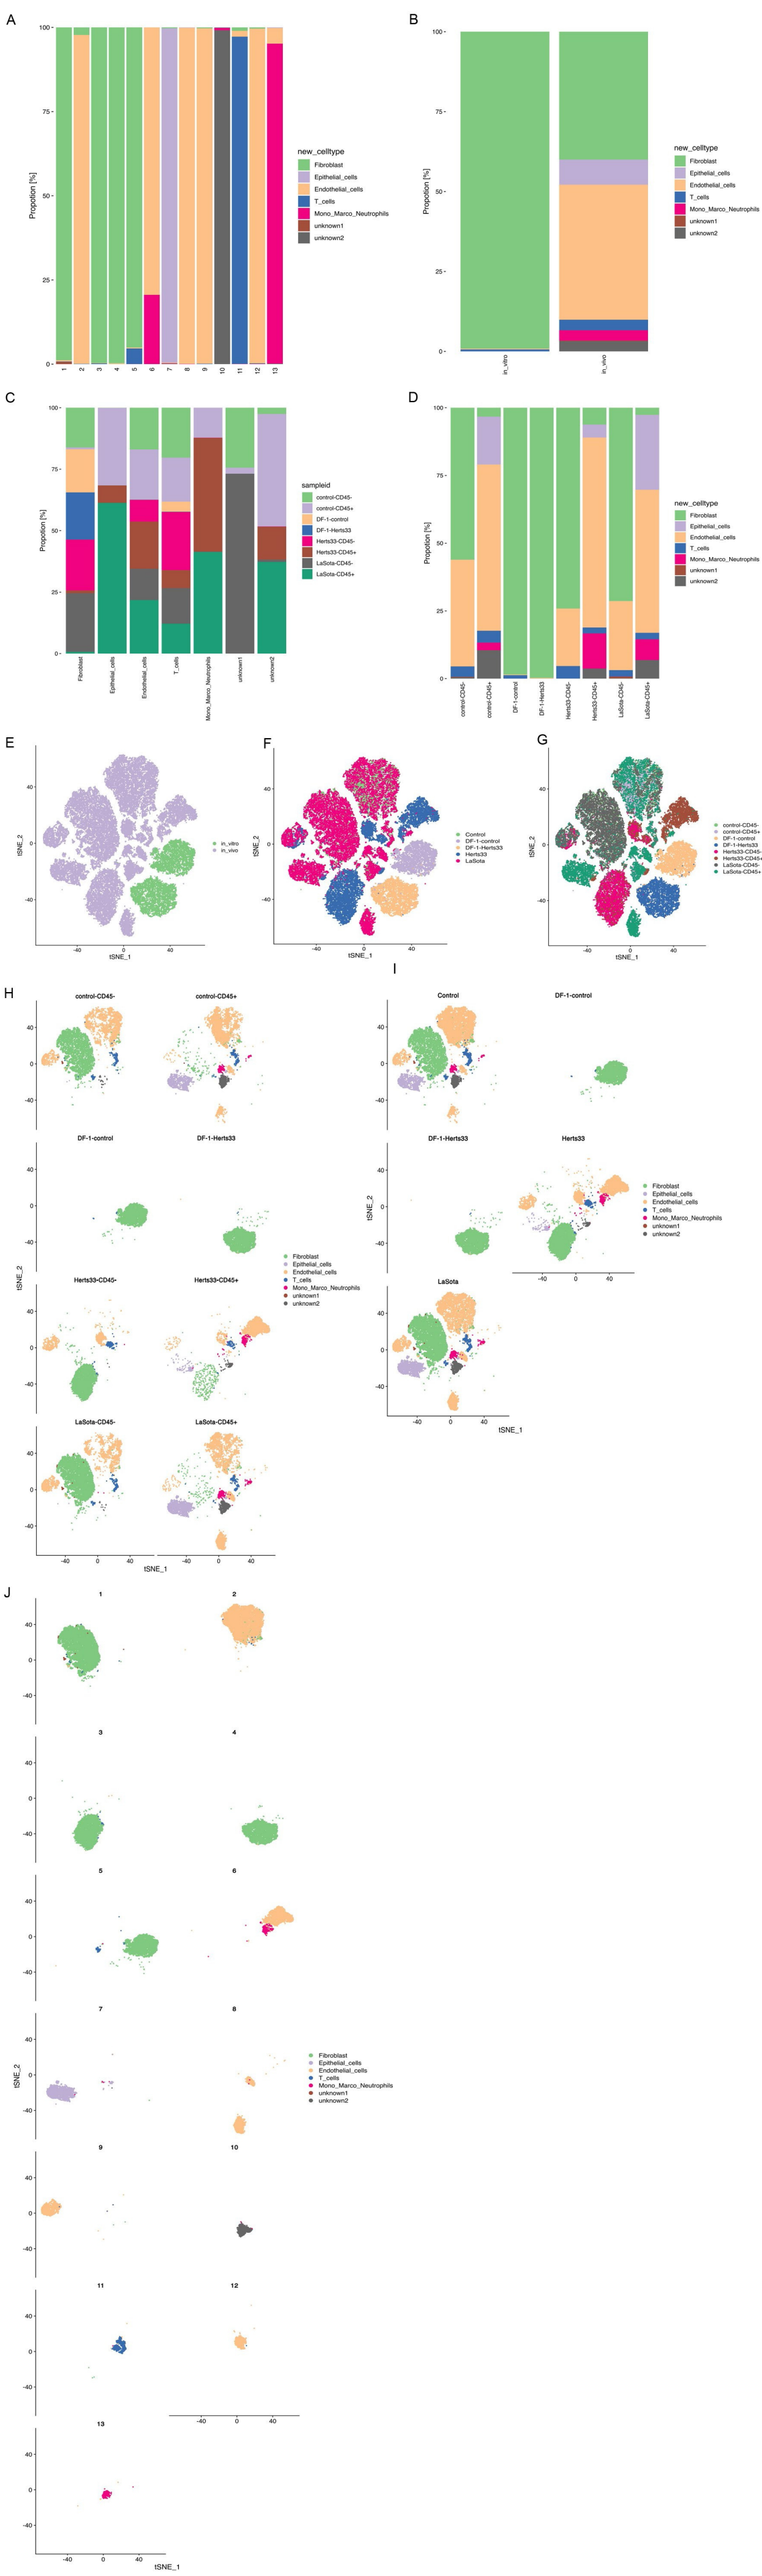

Supplementary Figure1

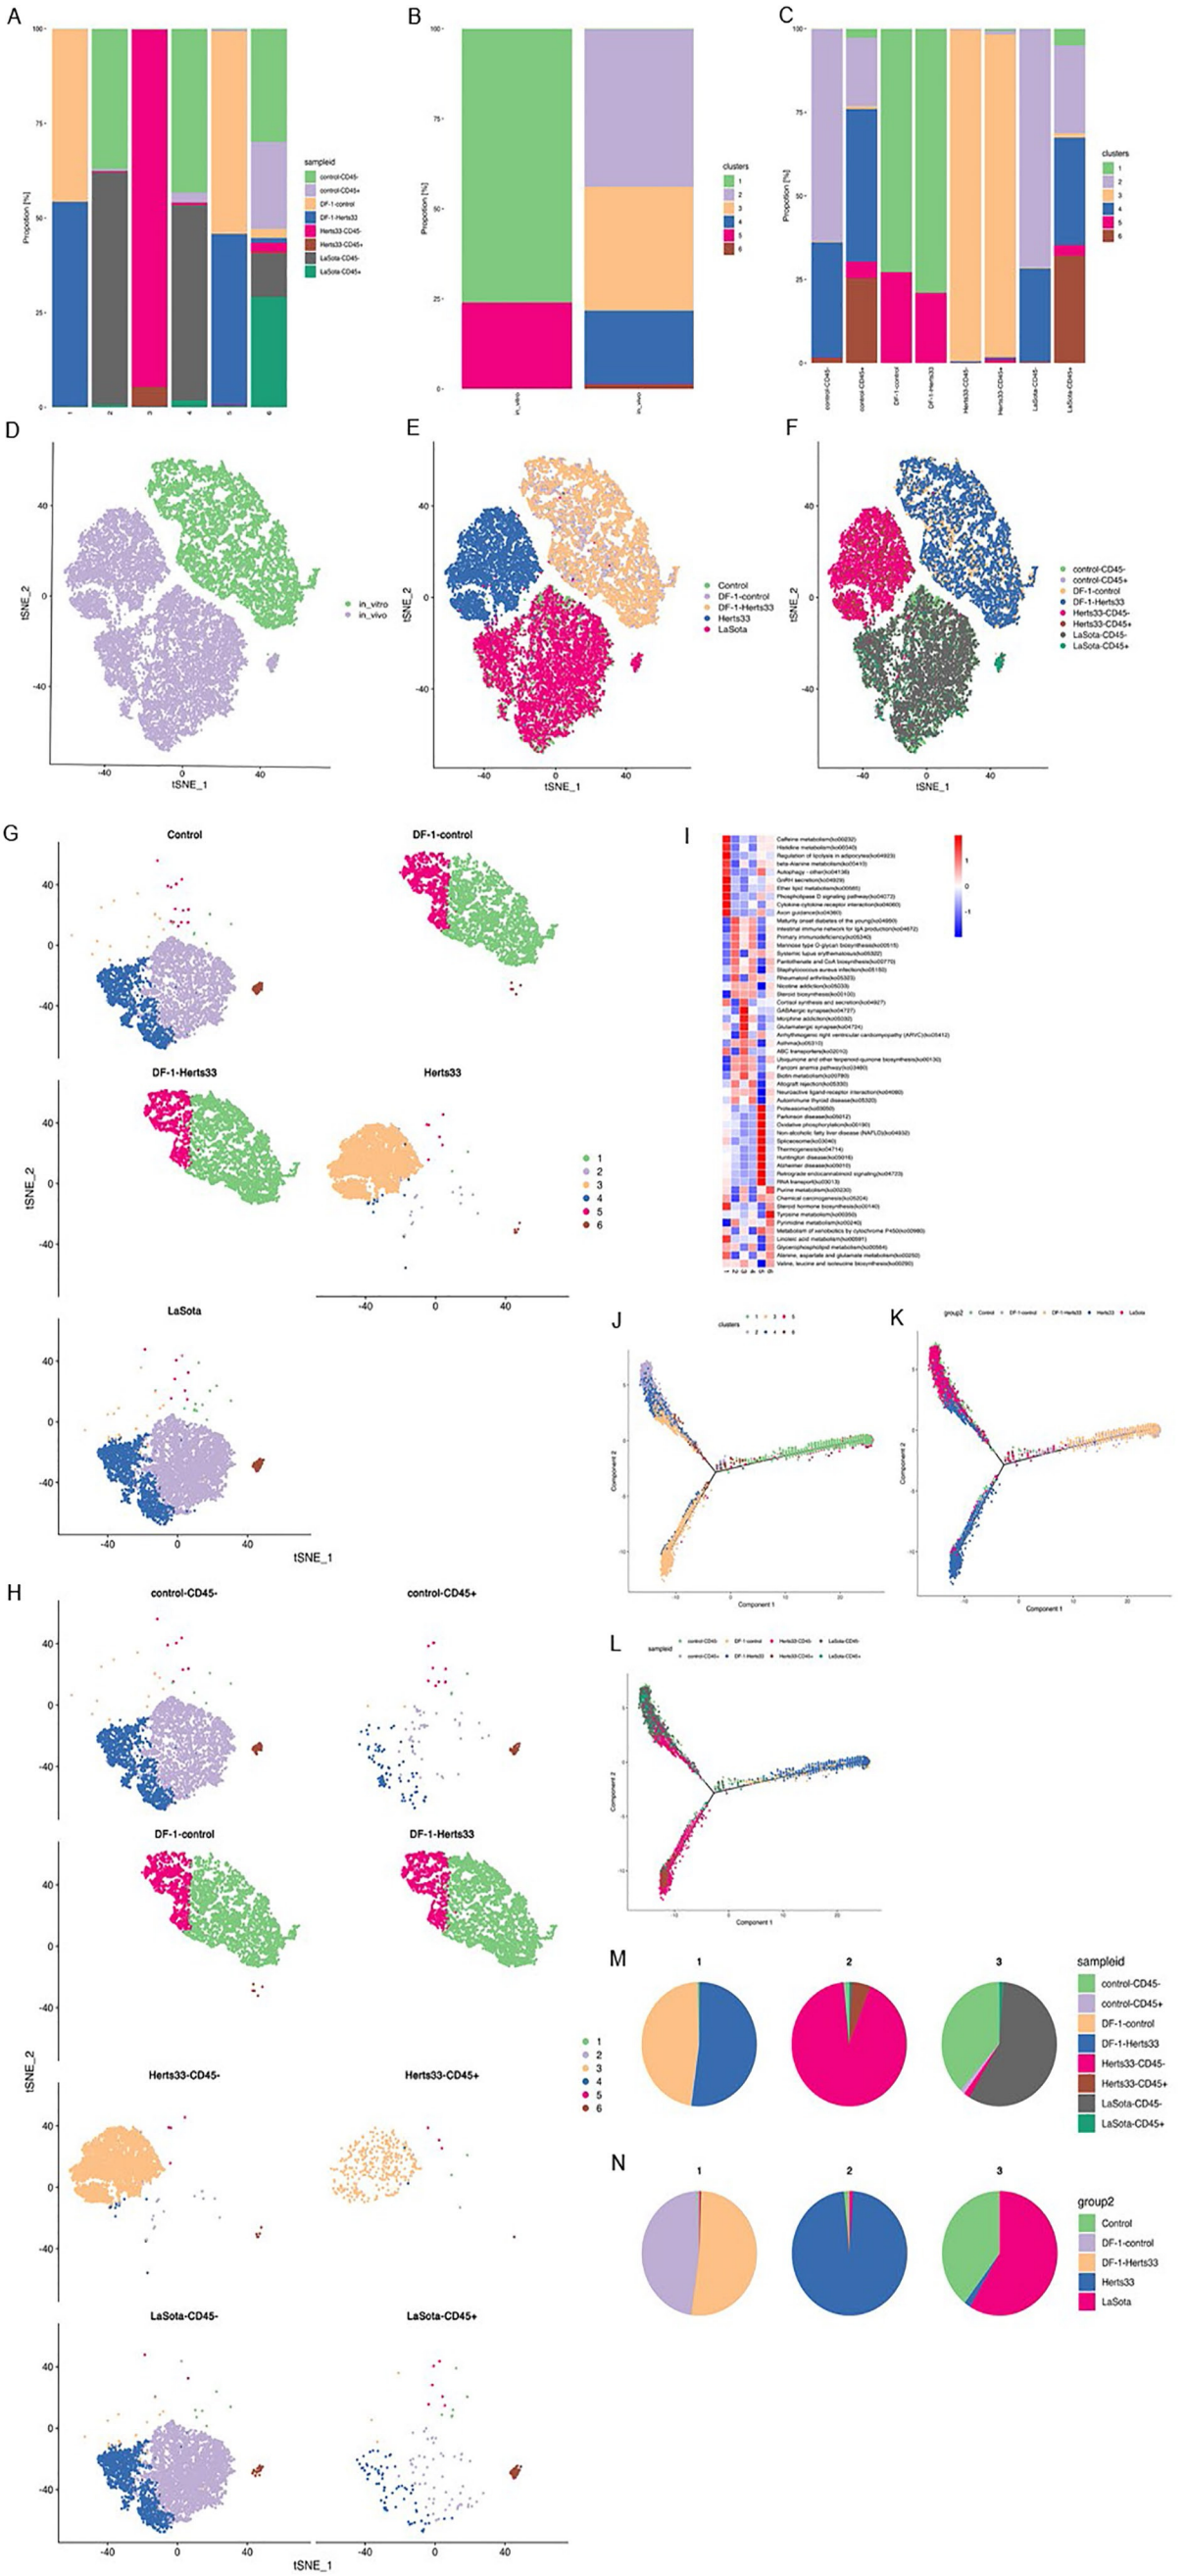

Supplementary Figure2

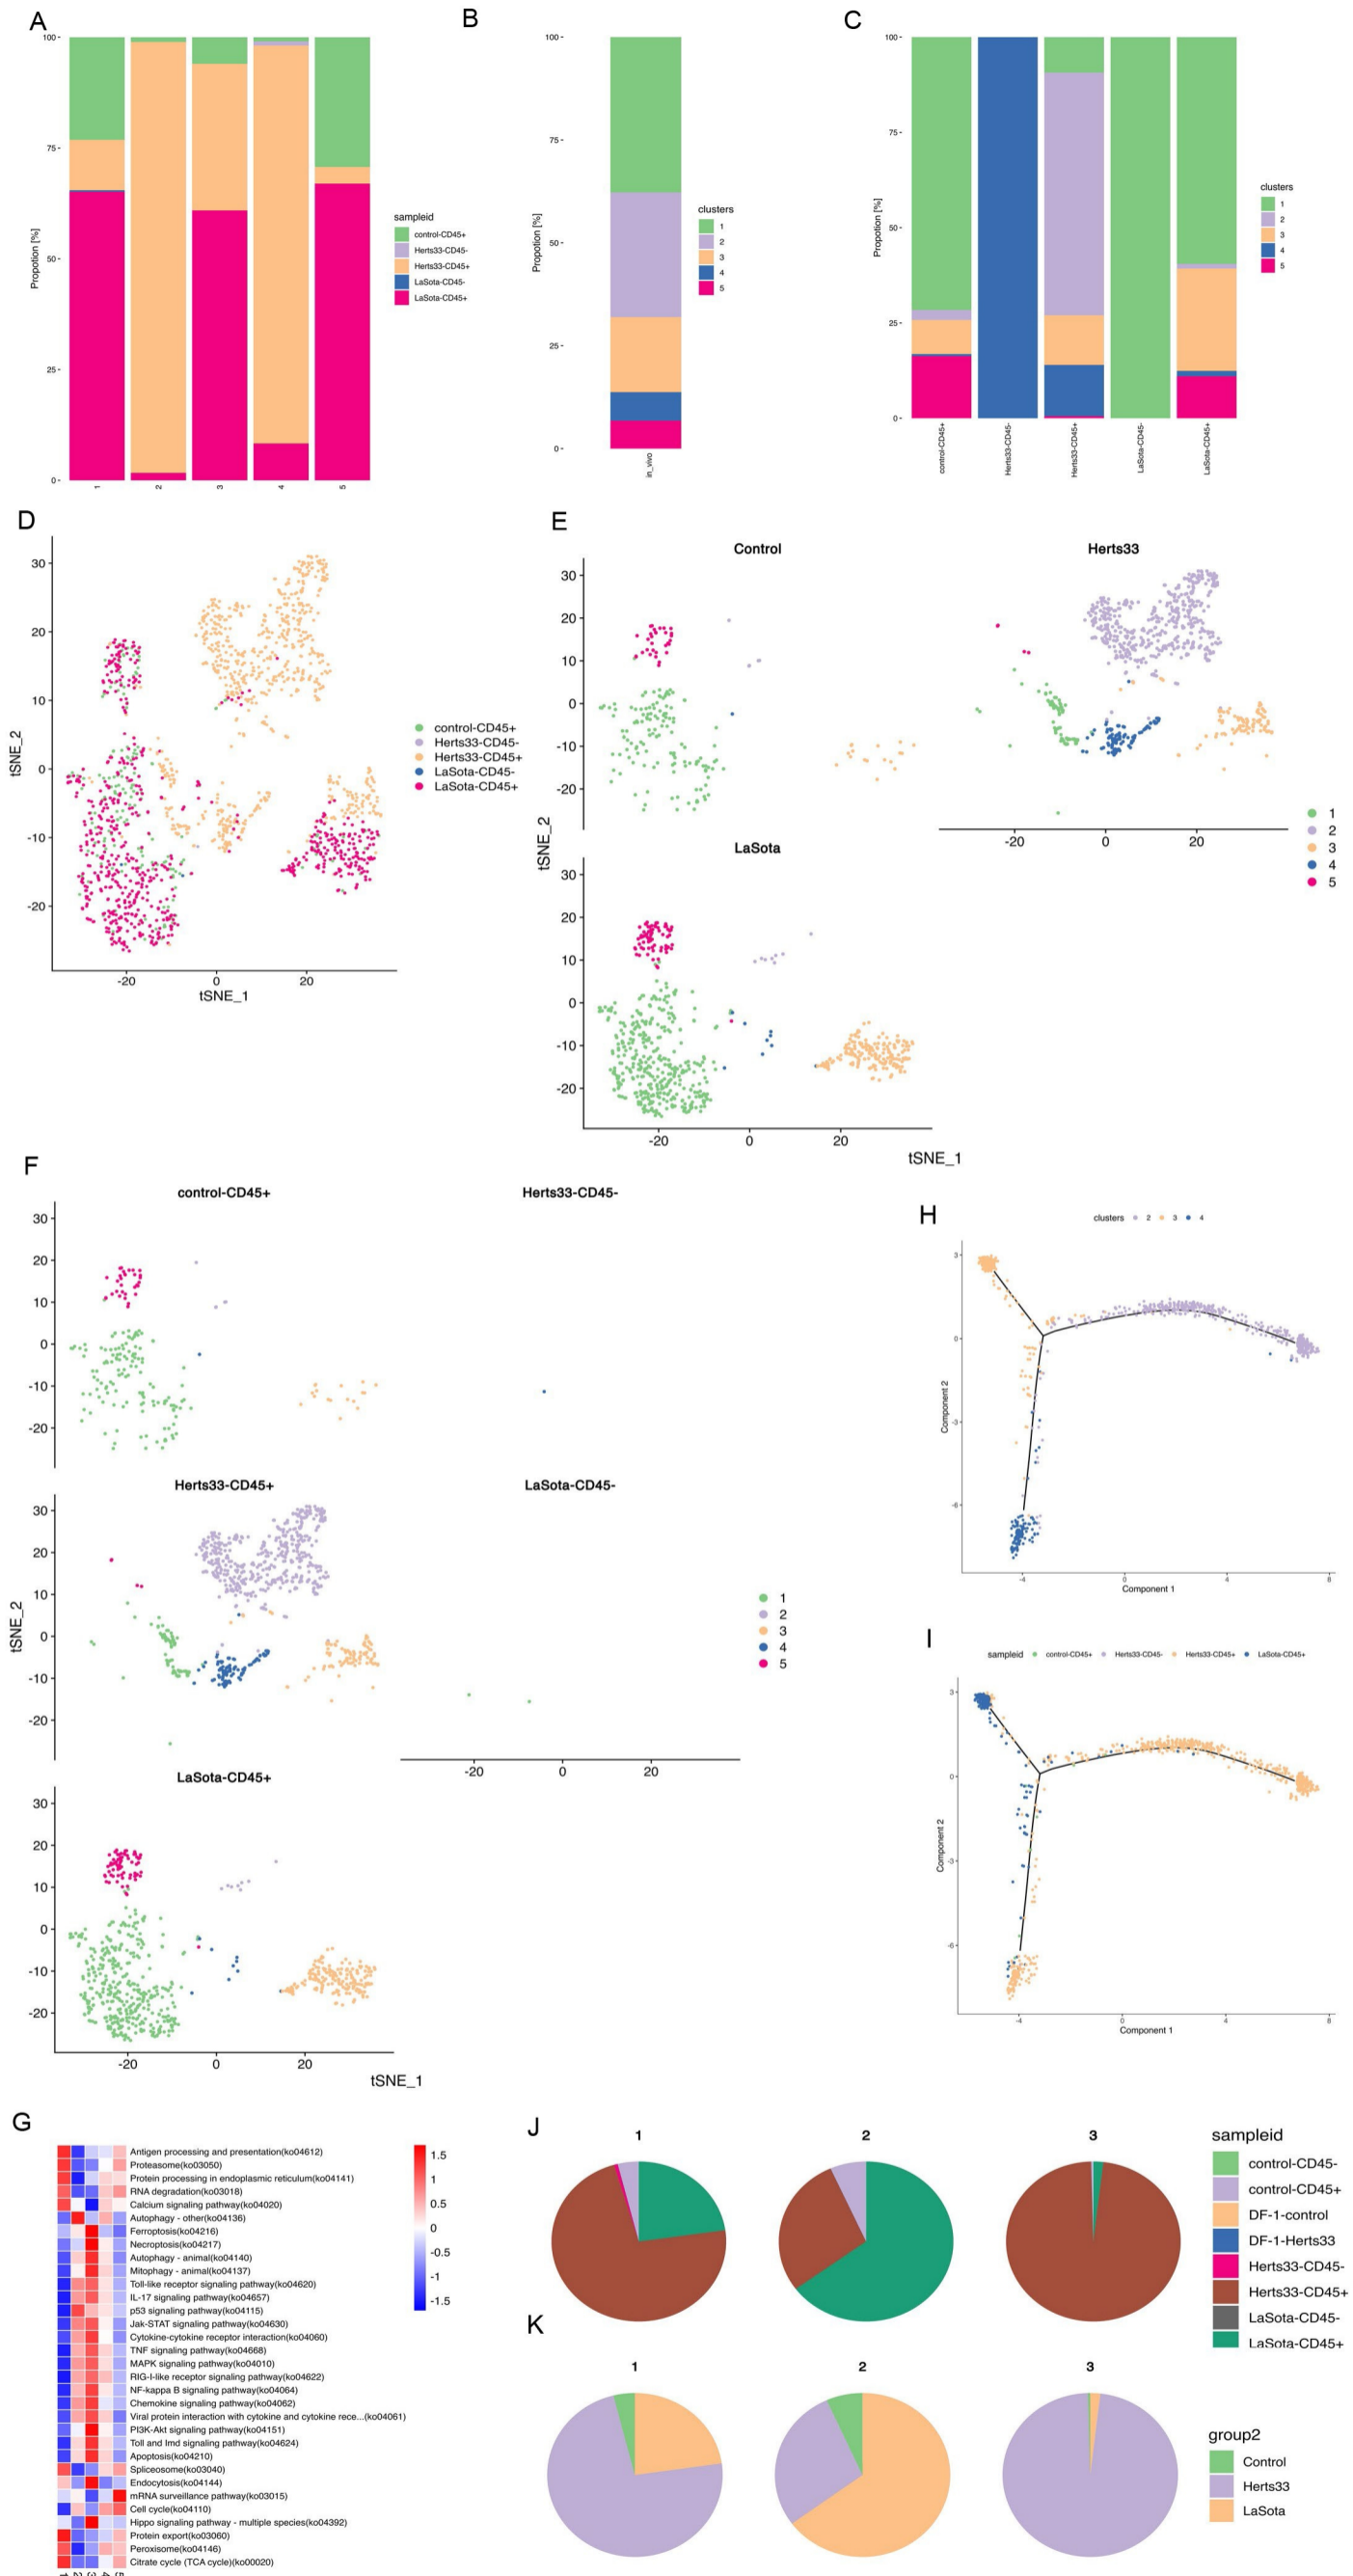

Supplementary Figure3

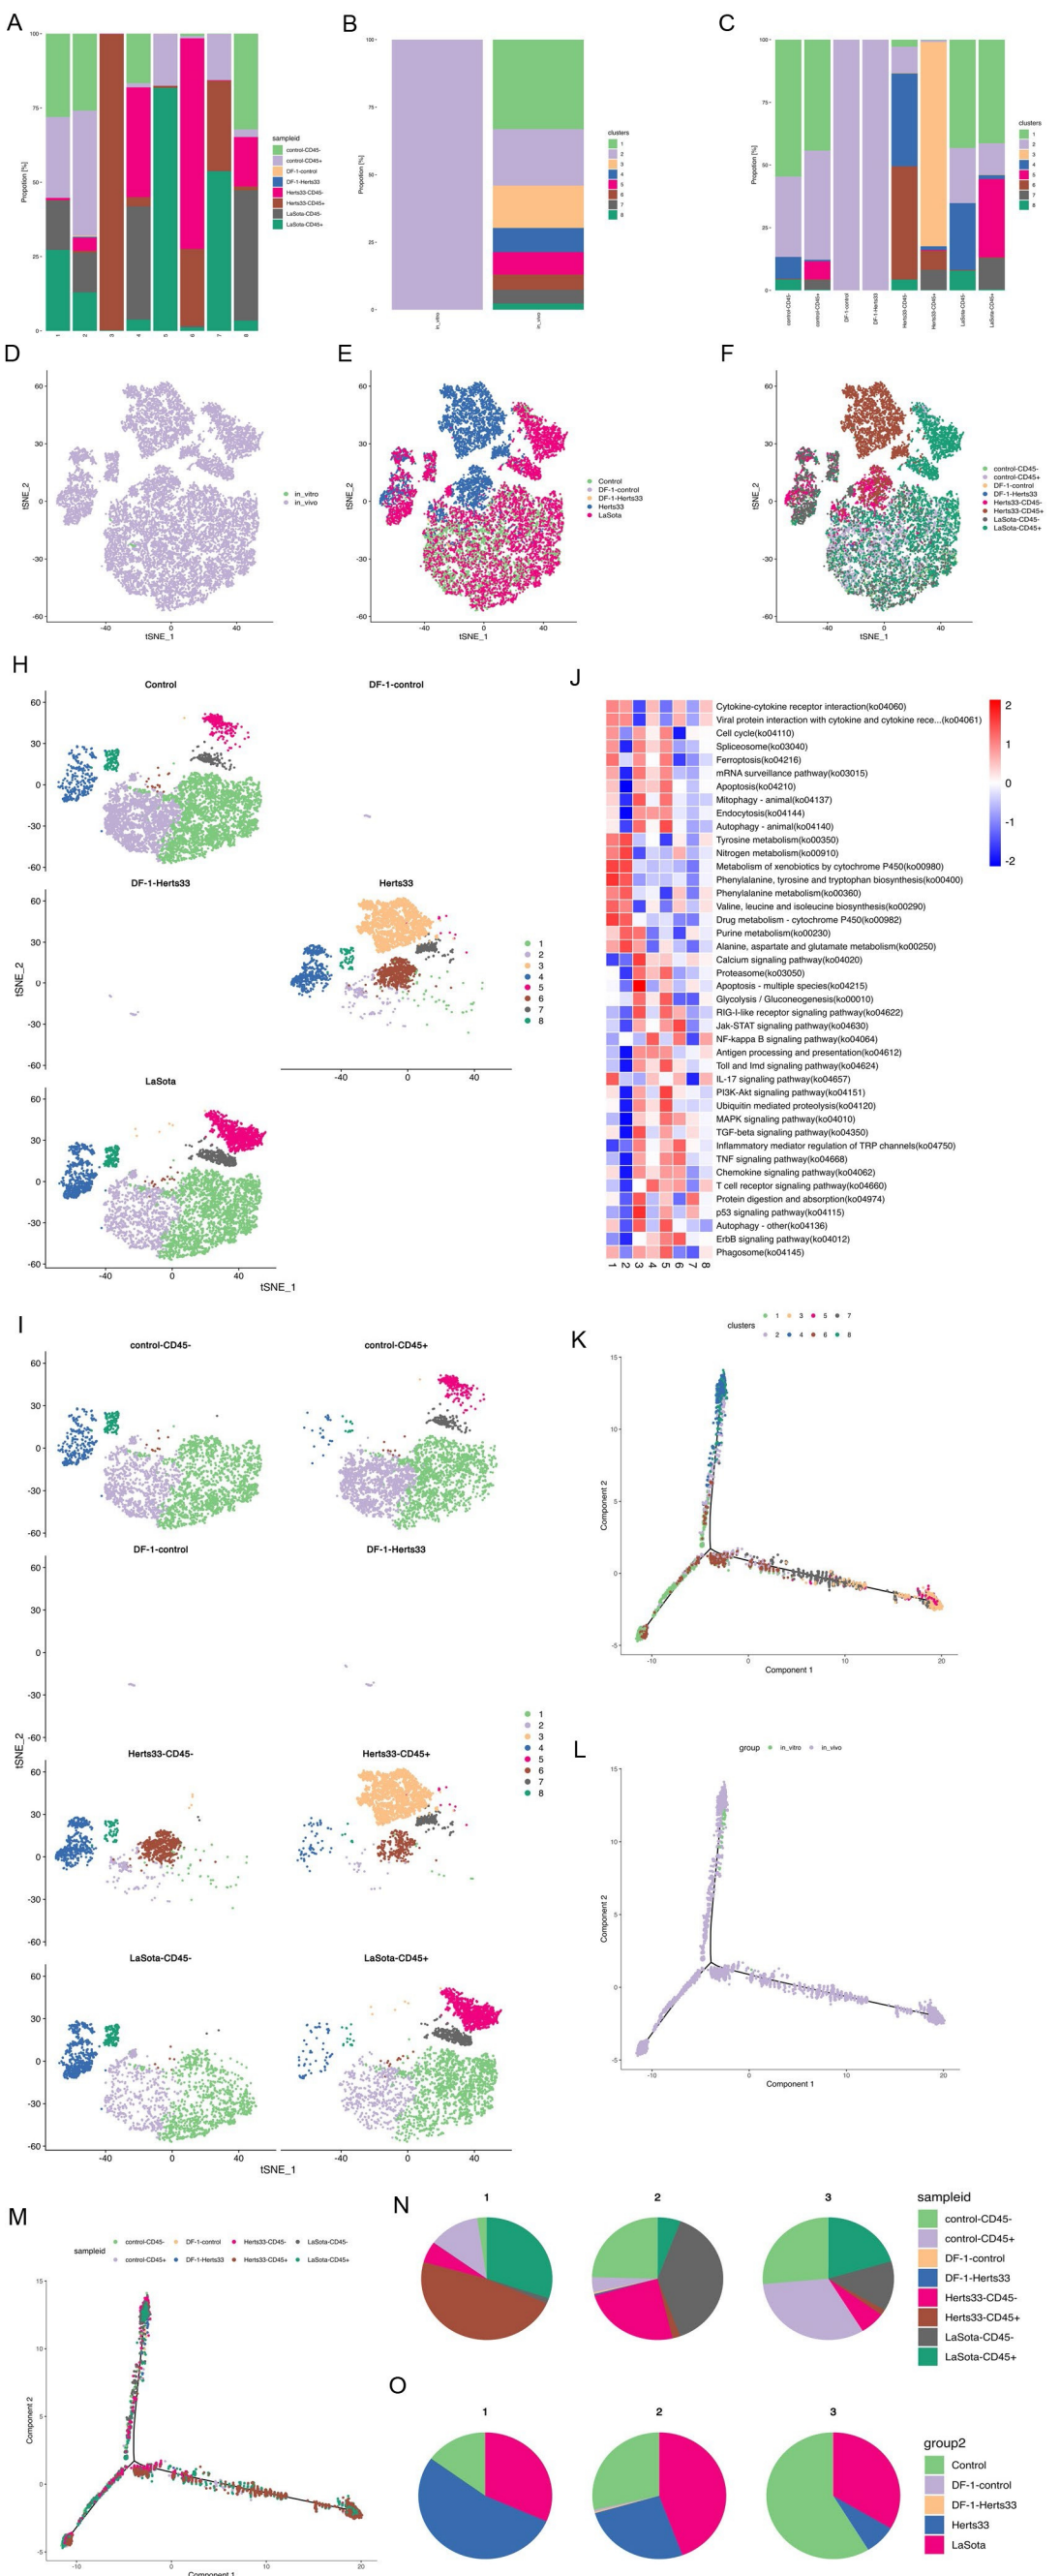

Supplementary Figure4

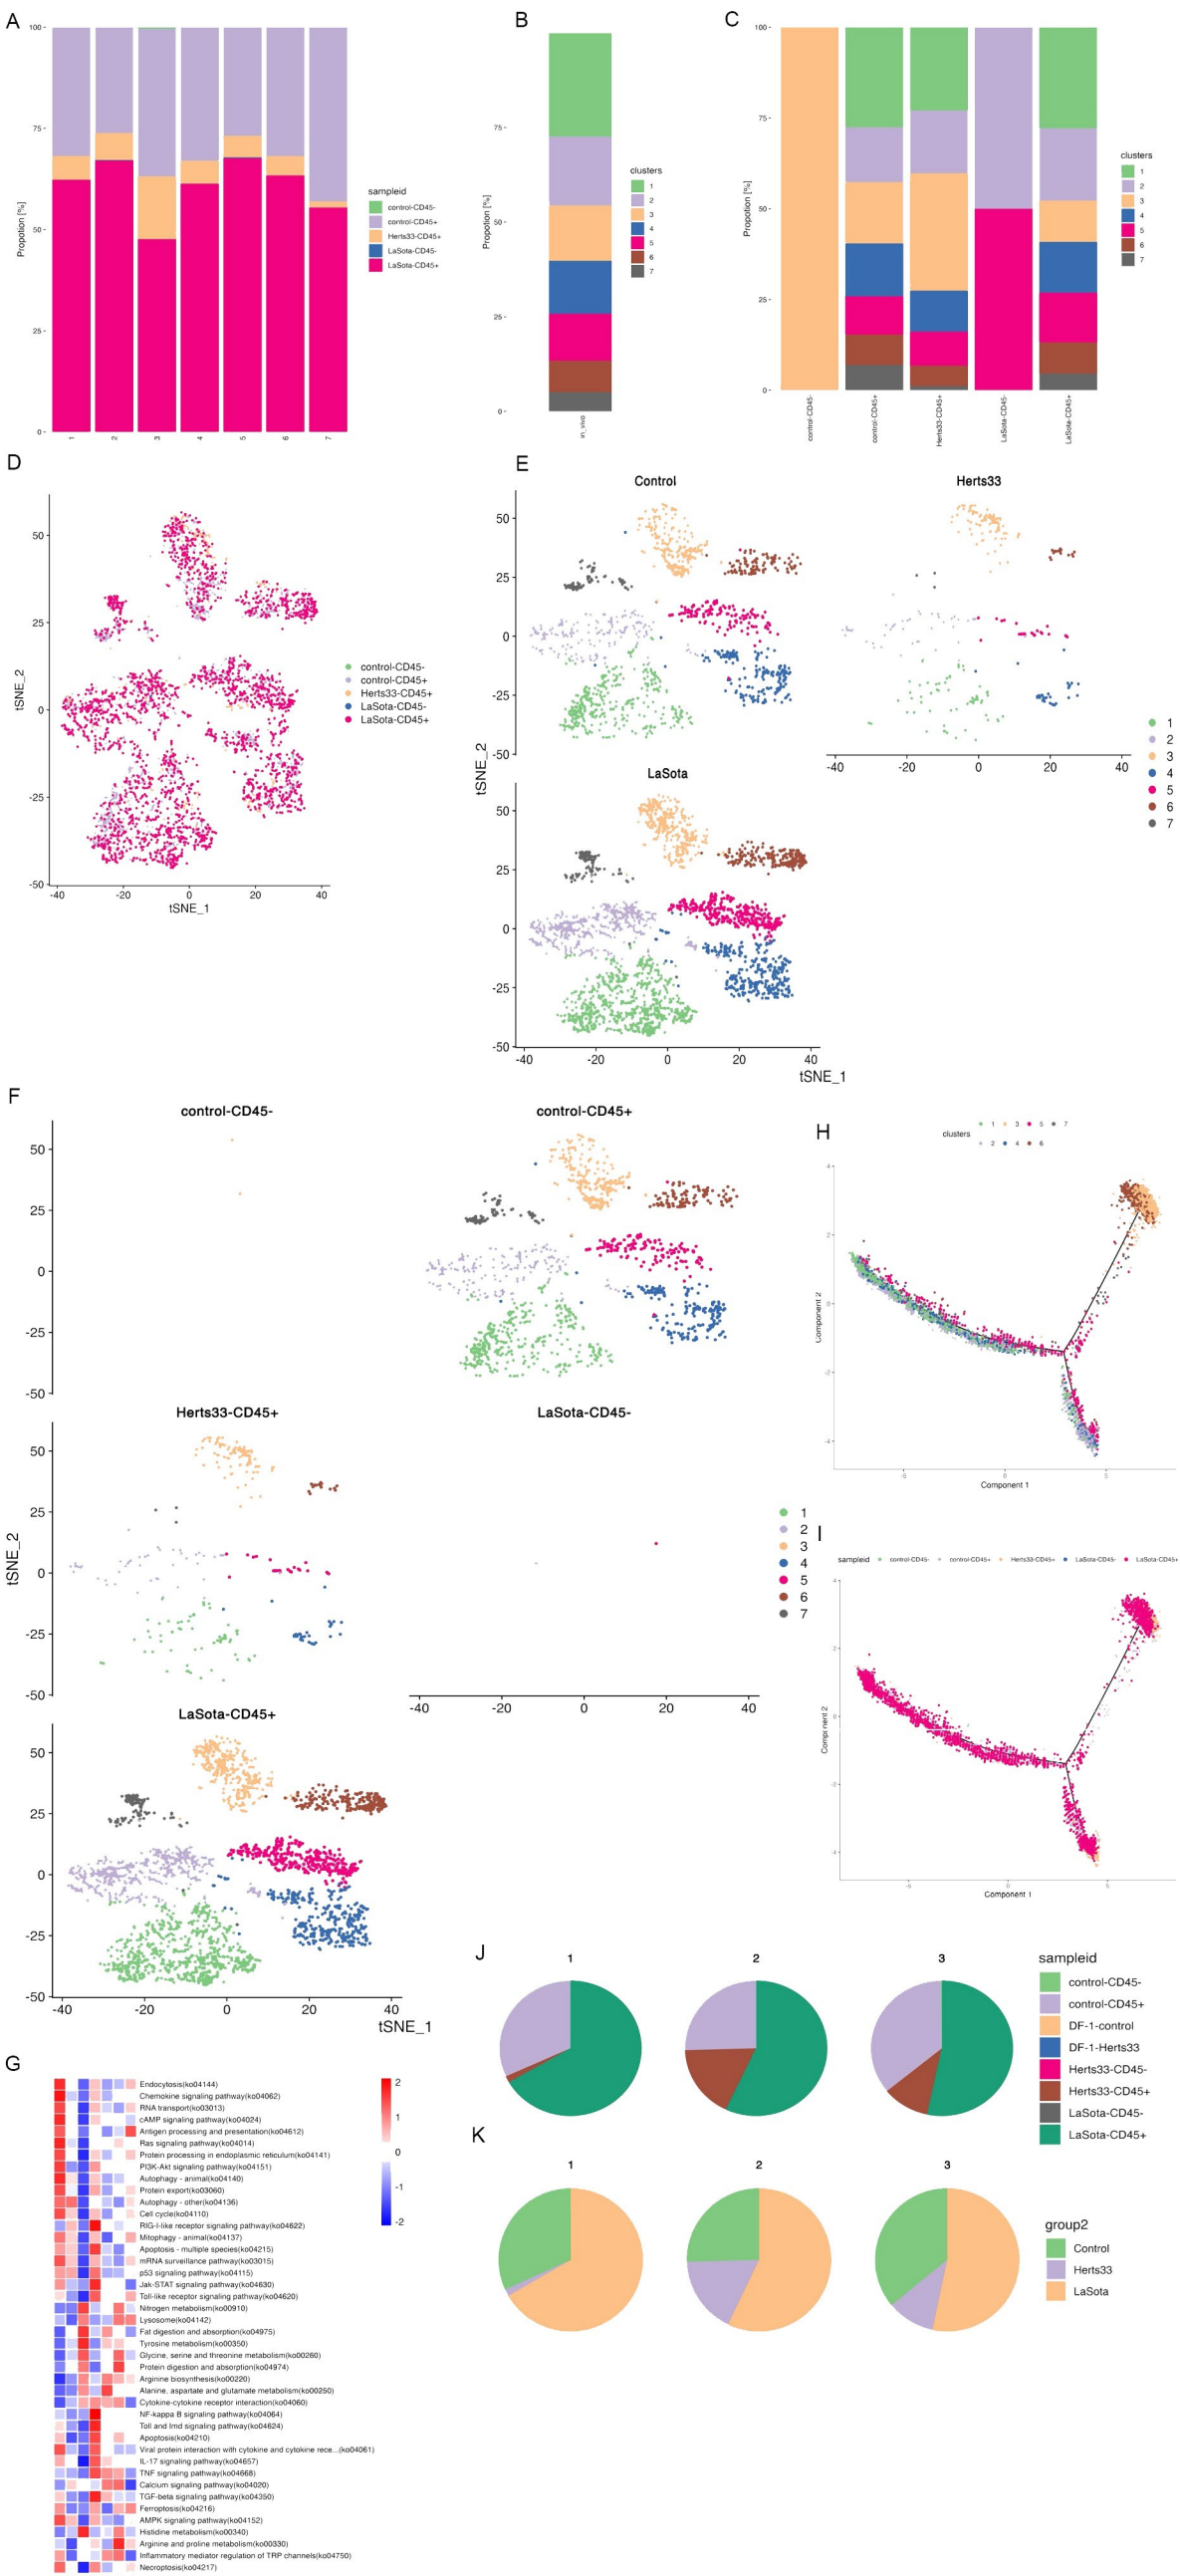

Supplementary Figure5

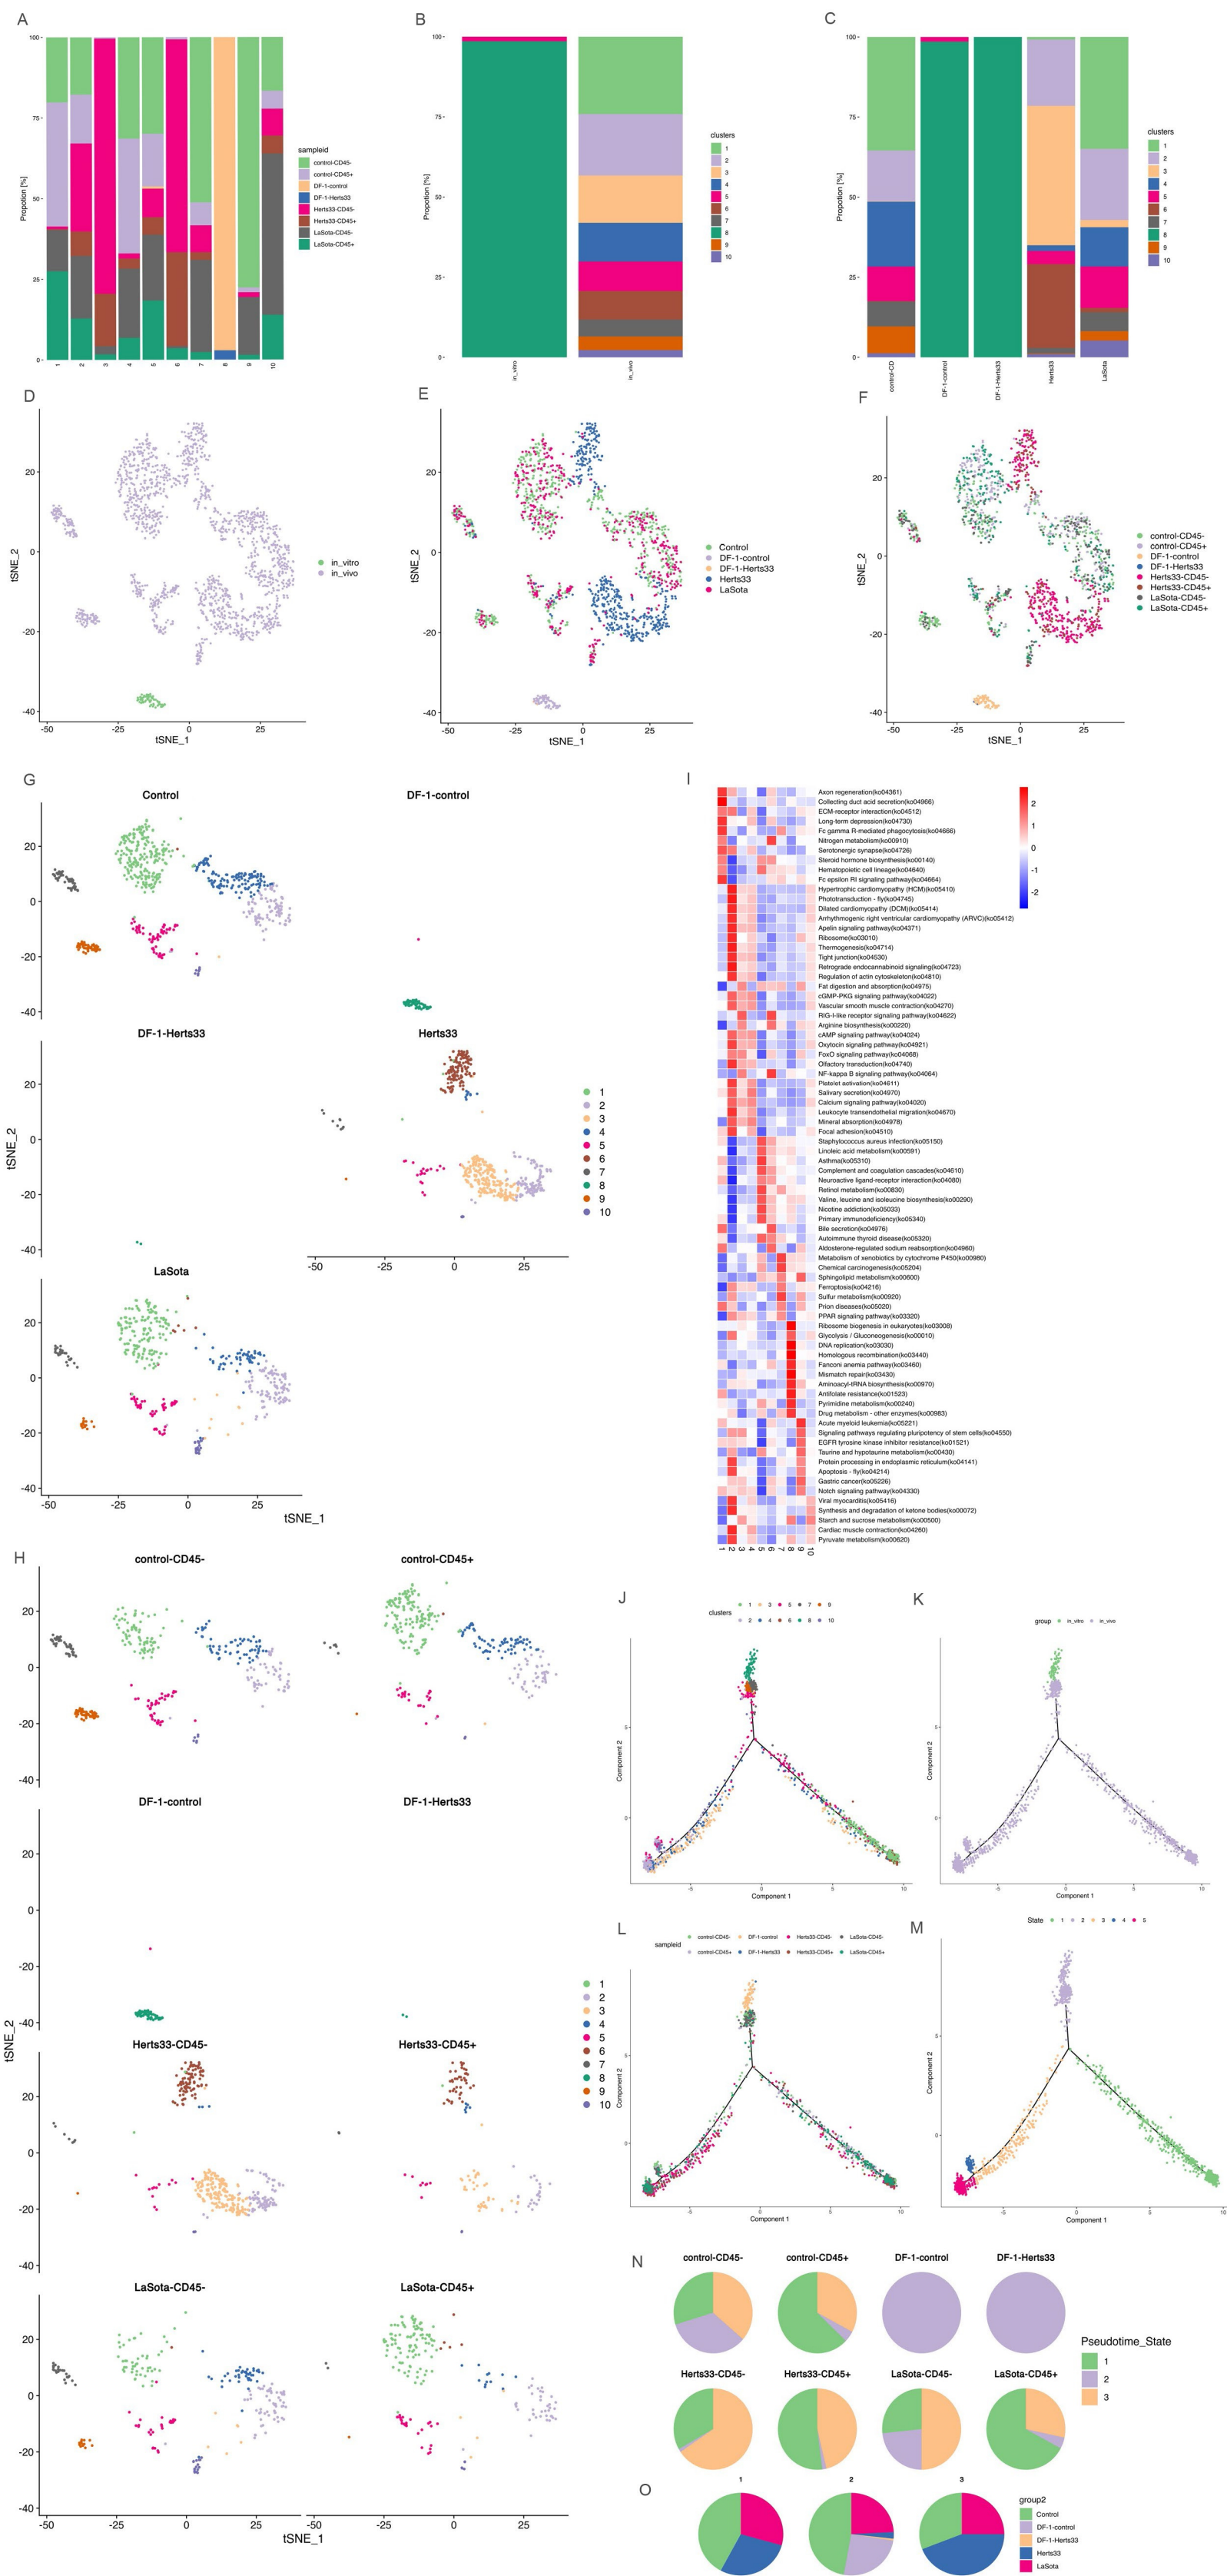

Supplementary Figure6

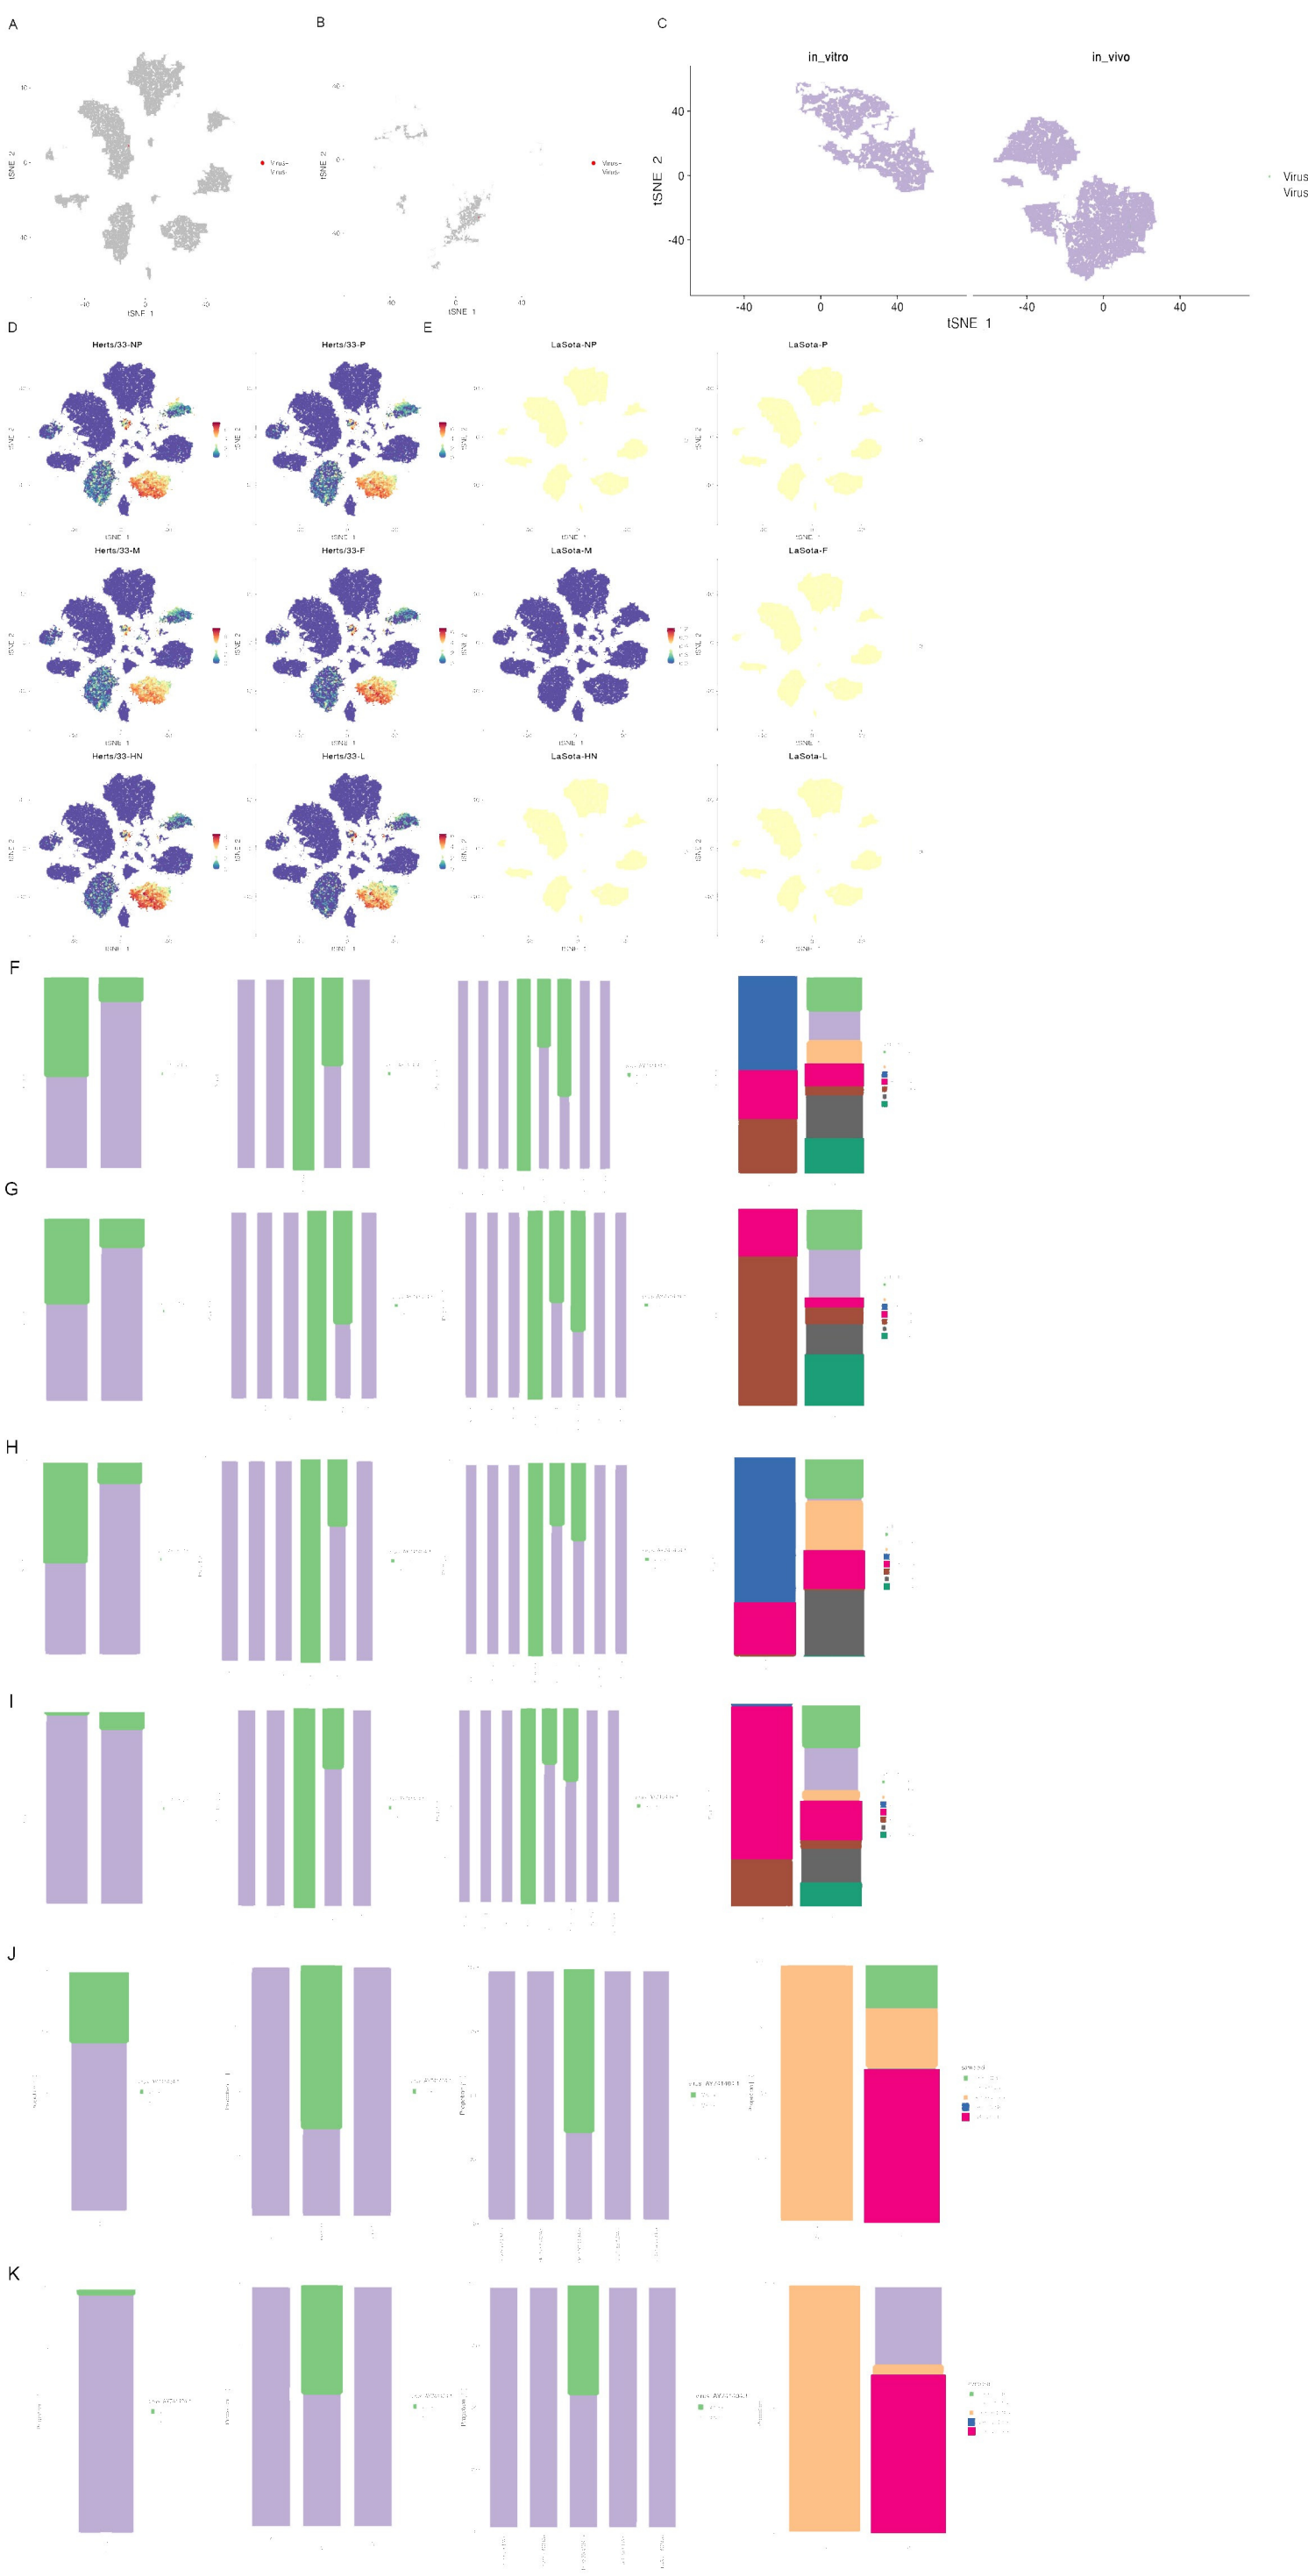

Supplementary Figure7

Control

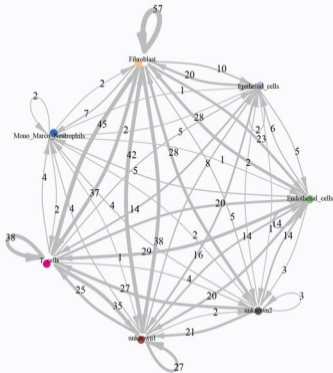

Herts/33

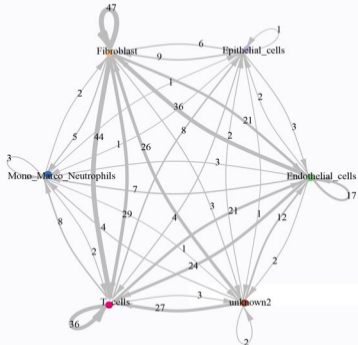

LaSota

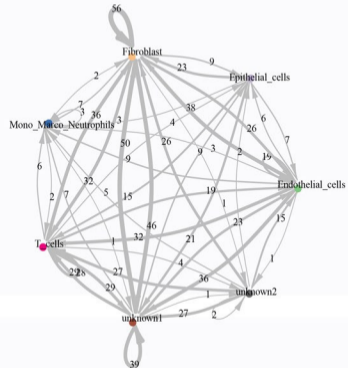

Supplementary Figure8



1 Supplementary Figure 1. Global single-cell transcriptional landscape in the chicken  
2 lung and DF-1 cell line. A. Barplots showing the proportion of each cluster in each  
3 cell type. B. Barplots showing the proportion of each cell type both *in vitro* and *in*  
4 *vivo*. C. Barplots showing the proportion of each sample in each cell type. D. Barplots  
5 showing the proportion of each cell type in each sample. t-SNE plot of the sample  
6 both *in vitro* and *in vivo*. F. t-SNE plot of the sample in control, Herts/33, LaSota,  
7 DF-1-control, and DF-1-Herts/33. G. t-SNE plot of the sample in  
8 control-CD45<sup>+</sup>/CD45<sup>-</sup>, Herts/33-CD45<sup>+</sup>/CD45<sup>-</sup>, LaSota-CD45<sup>+</sup>/CD45<sup>-</sup>, DF-1-control,  
9 and DF-1-Herts/33. H. t-SNE plot of the sample in control-CD45<sup>+</sup>/CD45<sup>-</sup>,  
10 Herts/33-CD45<sup>+</sup>/CD45<sup>-</sup>, LaSota-CD45<sup>+</sup>/CD45<sup>-</sup>, DF-1-control, and DF-1-Herts/33. I.  
11 t-SNE plot of the sample in control, Herts/33, LaSota, DF-1-control, and  
12 DF-1-Herts/33. J. t-SNE plot of each cell type in each cluster.

13

14 Supplementary Figure 2. Single-cell profiling of fibroblast cells. A. Barplots showing  
15 the proportion of each sample in each cluster. B. Barplots showing the proportion of  
16 each cell type both *in vitro* and *in vivo*. C. Barplots showing the proportion of each  
17 cluster in each sample. D. t-SNE plot of the sample both *in vitro* and *in vivo*. E. t-SNE  
18 plot of the sample in control, Herts/33, LaSota, DF-1-control, and DF-1-Herts/33. F.  
19 t-SNE plot of the sample in control-CD45<sup>+</sup>/CD45<sup>-</sup>, Herts/33-CD45<sup>+</sup>/CD45<sup>-</sup>,  
20 LaSota-CD45<sup>+</sup>/CD45<sup>-</sup>, DF-1-control, and DF-1-Herts/33. G. t-SNE plot of each cell  
21 cluster in control, Herts/33, LaSota, DF-1-control, and DF-1-Herts/33. H. t-SNE plot  
22 of each cell cluster in control-CD45<sup>+</sup>/CD45<sup>-</sup>, Herts/33-CD45<sup>+</sup>/CD45<sup>-</sup>,

23 LaSota-CD45<sup>+</sup>/CD45<sup>-</sup>, DF-1-control, and DF-1-Herts/33. I. Differences in pathway  
24 activities scored per cell by GSVA between epithelial cells isolated from different  
25 epithelial clusters, with enriched KO terms;  $P < 0.05$ . J–L. Pseudotime trajectory plot  
26 representing the features of each cluster (J) and in each sample (K and L) in the three  
27 identified states. M and N. Pie charts showing the proportion of cells in each sample  
28 in the three identified states.

29

30 Supplementary Figure 3. Single-cell profiling of myeloid cells. A. Barplots showing  
31 the proportion of each sample in each cluster. B. Barplots showing the proportion of  
32 each cell type *in vivo*. C. Barplots showing the proportion of each cluster in each  
33 sample. D. t-SNE plot of the sample in control, Herts/33, LaSota, DF-1-control, and  
34 DF-1-Herts/33. E. t-SNE plot of each cell cluster in the control, Herts/33, and LaSota  
35 groups. H. t-SNE plot of each cell cluster in control-CD45<sup>+</sup>, Herts/33-CD45<sup>+</sup>/CD45<sup>-</sup>,  
36 and LaSota-CD45<sup>+</sup>/CD45<sup>-</sup>. G. Differences in pathway activities scored per cell by  
37 GSVA between myeloid cells isolated from different epithelial clusters, with enriched  
38 KO terms;  $P < 0.05$ . H and I. Pseudotime trajectory plot representing the features of  
39 clusters 2, 3, and 4 (H) and in each sample (I) in the three identified states. J and K.  
40 Pie charts showing the proportion of cells in each sample in the three identified states.

41

42 Supplementary Figure 4. Single-cell profiling of endothelial cells. A. Barplots  
43 showing the proportion of each sample in each cluster. B. Barplots showing the  
44 proportion of each cell type both *in vitro* and *in vivo*. C. Barplots showing the

45 proportion of each cluster in each sample. D. t-SNE plot of the sample both *in vitro*  
46 and *in vivo*. E. t-SNE plot of the sample in control, Herts/33, LaSota, DF-1-control,  
47 and DF-1-Herts/33. F. t-SNE plot of the sample in control-CD45<sup>+</sup>/CD45<sup>-</sup>,  
48 Herts/33-CD45<sup>+</sup>/CD45<sup>-</sup>, LaSota-CD45<sup>+</sup>/CD45<sup>-</sup>, DF-1-control, and DF-1-Herts/33. G.  
49 t-SNE plot of each cell cluster in control, Herts/33, LaSota, DF-1-control, and  
50 DF-1-Herts/33. H. t-SNE plot of each cell cluster in control-CD45<sup>+</sup>/CD45<sup>-</sup>,  
51 Herts/33-CD45<sup>+</sup>/CD45<sup>-</sup>, LaSota-CD45<sup>+</sup>/CD45<sup>-</sup>, DF-1-control, and DF-1-Herts/33. I.  
52 Differences in pathway activities scored per cell by GSVA between endothelial cells  
53 isolated from different epithelial clusters, with enriched KO terms;  $P < 0.05$ . J–L.  
54 Pseudotime trajectory plot representing the features of each cluster *in vivo* (J), *in vitro*  
55 (K), and in each sample (L) in the three identified states. M and N. Pie charts showing  
56 the proportion of cells in each sample in the three identified states.  
57  
58 Supplementary Figure 5. Single-cell profiling of epithelial cells. A. Barplots showing  
59 the proportion of each sample in each cluster. B. Barplots showing the proportion of  
60 each cell type *in vivo*. C. Barplots showing the proportion of each cluster in each  
61 sample. D. t-SNE plot of the sample in control-CD45<sup>-</sup>/control-CD45<sup>+</sup>,  
62 Herts/33-CD45<sup>+</sup>, and LaSota-CD45<sup>+</sup>/CD45<sup>-</sup>. E. t-SNE plot of each cell cluster in the  
63 control, Herts/33, and LaSota groups. F. t-SNE plot of each cell cluster in  
64 control-CD45<sup>-</sup>/control-CD45<sup>+</sup>, Herts/33-CD45<sup>+</sup>, and LaSota-CD45<sup>+</sup>/CD45<sup>-</sup>. G.  
65 Differences in pathway activities scored per cell by GSVA between myeloid cells  
66 isolated from different epithelial clusters, with enriched KO terms;  $P < 0.05$ . H and I.

67 Pseudotime trajectory plot representing the features of each cluster (H) and each  
68 sample (I) in the three identified states. K. Pie charts showing the proportion of cells  
69 in each sample in the three identified states.

70

71 Supplementary Figure 6. Single-cell profiling of T cells. A. Barplots showing the  
72 proportion of each sample in each cluster. B. Barplots showing the proportion of each  
73 cell type both *in vitro* and *in vivo*. C. Barplots showing the proportion of each cluster  
74 in each sample. D. t-SNE plot of the sample both *in vitro* and *in vivo*. E. t-SNE plot of  
75 the sample in control, Herts/33, LaSota, DF-1-control, and DF-1-Herts/33. F. t-SNE  
76 plot of the sample in control-CD45<sup>+</sup>/CD45<sup>-</sup>, Herts/33-CD45<sup>+</sup>/CD45<sup>-</sup>,  
77 LaSota-CD45<sup>+</sup>/CD45<sup>-</sup>, DF-1-control, and DF-1-Herts/33. G. t-SNE plot of each cell  
78 cluster in control, Herts/33, LaSota, DF-1-control, and DF-1-Herts/33. H. t-SNE plot  
79 of each cell cluster in control-CD45<sup>+</sup>/CD45<sup>-</sup>, Herts/33-CD45<sup>+</sup>/CD45<sup>-</sup>,  
80 LaSota-CD45<sup>+</sup>/CD45<sup>-</sup>, DF-1-control, and DF-1-Herts/33. I. Differences in pathway  
81 activities scored per cell by GSVA between T cells isolated from different T cell  
82 clusters, with enriched KO terms;  $P < 0.05$ . J–M. Pseudotime trajectory plot  
83 representing the features of each cluster *in vivo* (J), *in vitro* (K), and in each sample (L)  
84 in the three identified states. The five states were considered as three because states 3,  
85 4, and 5 were on the same branch (M). N and O. Pie charts showing the proportion of  
86 cells in each sample in the three identified states.

87

88 Supplementary Figure 7. A. Only two cells with LaSota RNA were detected (UMI > 0)  
89 from total cells *in vivo*. B. Cells with LaSota RNA detected (UMI > 0) from fibroblast  
90 cells *in vivo*. C. Cells with LaSota RNA detected (UMI > 0) from cells *in vivo*. D.  
91 t-SNE plot of the virus genes of Herts/33 in each cluster. E. t-SNE plot of the virus  
92 genes of LaSota in each cluster. F–K. Proportion of virus<sup>+</sup> and virus<sup>-</sup> cells in different  
93 samples, and the composition of different samples in virus<sup>+</sup> and virus<sup>-</sup> cells.

94

95 Supplementary Figure 8. Cell–cell communication. Predicted number of interactions  
96 among mono-macro-neutrophil, T, fibroblast, endothelial, epithelial, unknown1, and  
97 unknown2 cells based on CellPhoneDB in the control, Herts/33, and LaSota groups.

98

99

100 Supplementary Table 1. Gene quantitative quality control overview of the sequencing  
101 library, alignment of scRNA-seq, and marker genes used for cell type identification.

102

103

104
